## Correspondence

### Uptake of Lidocaine from the Trachea

To the Editor:—I read with interest the paper, "Lidocaine in Arterial Blood after Laryngotracheal Administration" by Viegas and Stoelting.<sup>1</sup>

In 1972, at the Fifth World Congress of Anesthesiology,<sup>2</sup> we reported a similar investigation measuring the uptake of lidocaine from the trachea. Thirty patients admitted for minor operations on the nose and throat was studied. Lidocaine, 4 per cent, 2 mg/kg, was instilled into the trachea via a Steiner cannula. Our results are shown in figure 1. There was a significant and continual increase in lidocaine and its metabolites in plasma throughout the first 30 to 60 minutes, followed by a gradual decline in plasma levels thereafter.

The plasma level of lidocaine rarely exceeded 1  $\mu\text{g/ml}$ . Glycine xylidide was by far the most major metabolite seen in the plasma, and its blood levels frequently exceeded 8  $\mu\text{g/ml}$ . The plasma levels of monoethyl glycine xylidide were below that of lidocaine, and only occasionally was the parahydroxy metabolite observed at the lower limits of detection (0.2  $\mu\text{g/ml}$ ). The peak blood levels of lidocaine in the 30 patients ranged from a low of 0.1  $\mu\text{g/ml}$  to a high of 2.0  $\mu\text{g/ml}$ .

In 1965, Telivuo<sup>3</sup> also found a slow absorption of lidocaine from the respiratory tract with spontaneous ventilation. Recently, Chuet *et al.*<sup>4</sup> also found slow absorption. There seems to be adequate evidence to dispel the earlier belief<sup>5</sup> that local anesthetic absorption through the mucous membrane, at least in the trachea, could simulate intravenous administration.

R. BRIAN SMITH, M.D.

Department of Anesthesiology  
University of Pittsburgh School of Medicine  
Pittsburgh, Pennsylvania 15261

#### REFERENCES

1. Viegas O, Stoelting R: Lidocaine in arterial blood after laryngotracheal administration. *ANESTHESIOLOGY* 43:491-493, 1975

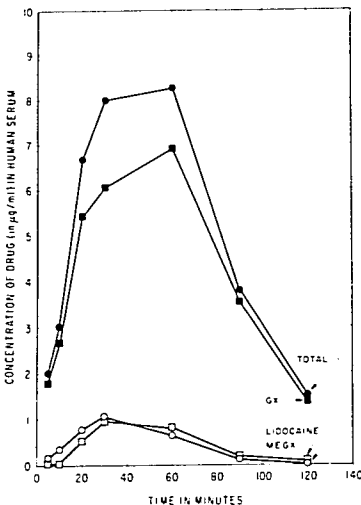

FIG. 1. Results. MEGX = monoethyl glycine xylidide; GX = glycine xylidide; TOTAL = lidocaine and metabolites.

2. Cohn ML, Smith RB, Sievenpiper T: Concentrations of lidocaine and its metabolites in the blood after endotracheal administration. *Excerpta Medica. Fifth World Congress of Anaesthesiologists* 261:118-119, 1972
3. Telivuo L: An experimental study on the absorption of some local anaesthetics through the lower respiratory tract. *Acta Anaesth Scand suppl XVI*:121-133, 1965
4. Chu SS, Rah KH, Brannan MD, et al: Plasma concentration of lidocaine after endotracheal spray. *Anesth Analg (Cleve)* 54:438-441, 1975
5. Adriani J, Campbell D: Fatalities following topical application of local anesthetics to mucous membranes. *JAMA* 162:1527-1530, 1956

(Accepted for publication November 18, 1975.)

## Specific Gravity and Density

To the Editor:—By definition, specific gravity (Sp Gr)—some prefer “relative density”—requires *two* particular temperatures.<sup>1</sup> Density (D), a similar and more fundamental physical property, requires but *one* temperature.<sup>2</sup> Wilbert King and I reported a mean human cerebrospinal fluid (CSF) D 37 C of 1.0010 g/ml (numerically equals Sp Gr

37/4 C) with a safe 99.73 per cent normal distribution range of 0.9998–1.0022.<sup>3</sup> Dividing this mean CSF Sp Gr 37/4 C by the water D 37 C, 0.9934 g/ml, yields a mean Sp Gr 37/37 C of 1.0077. Both means represent the Sp Gr of CSF at body temperature; yet they differ by a vast 0.0067. The reason lies in the second, denominator reference water temper-

TABLE I. Specific Gravities and Densities of Some Peridural Anesthetic Agents

|                                       | Specific Gravity                |                                 | Density (g/ml)           |                                | Reference |
|---------------------------------------|---------------------------------|---------------------------------|--------------------------|--------------------------------|-----------|
|                                       | $\frac{25}{25}^{\circ}\text{C}$ | $\frac{37}{37}^{\circ}\text{C}$ |                          |                                |           |
|                                       |                                 |                                 | $25^{\circ}\text{C}^{*}$ | $37^{\circ}\text{C}^{\dagger}$ |           |
| Water                                 | 1.0000                          | 1.0000                          | 0.9971                   | 0.9934                         | 3         |
| Citanest                              |                                 |                                 |                          |                                | §         |
| 1 per cent                            | 1.0055                          |                                 | 1.0026                   |                                |           |
| 2 per cent                            | 1.0071                          |                                 | 1.0042                   |                                |           |
| 3 per cent                            | 1.0085                          |                                 | 1.0056                   |                                |           |
| Lidocaine                             |                                 |                                 |                          |                                | §         |
| 1 per cent                            | 1.0064                          |                                 | 1.0035                   |                                |           |
| 1.5 per cent                          | 1.0064                          |                                 | 1.0035                   |                                |           |
| 2 per cent                            | 1.0067                          |                                 | 1.0038                   |                                |           |
| Lidocaine with epinephrine, 1:100,000 |                                 |                                 |                          |                                | §         |
| 1 per cent                            | 1.0066                          |                                 | 1.0037                   |                                |           |
| 2 per cent                            | 1.0075                          |                                 | 1.0046                   |                                |           |
| Carbocaine                            |                                 |                                 |                          |                                | ¶         |
| 1.0 per cent‡                         | 1.006                           | 1.006                           | 1.003                    | 0.999                          |           |
| 1.5 per cent‡                         | 1.006                           | 1.006                           | 1.003                    | 0.999                          |           |
| 2.0 per cent‡                         | 1.006                           | 1.006                           | 1.003                    | 0.999                          |           |
| Maracaine                             |                                 |                                 |                          |                                | ¶         |
| 0.25 per cent‡                        | 1.0061                          | 1.0063                          | 1.0032                   | 0.9997                         |           |
| 0.50 per cent‡                        | 1.0064                          | 1.0059                          | 1.0035                   | 0.9993                         |           |
| 0.75 per cent‡                        | 1.0059                          | 1.0058                          | 1.0030                   | 0.9992                         |           |
| Nesacaine-CE                          |                                 |                                 |                          |                                | §         |
| 2 per cent, range                     | 1.0100–1.0103                   | 1.0044–1.0099                   | 1.0071–1.0074            | 0.9978–1.0032                  |           |
| 3 per cent, range                     | 1.0111                          | 1.0104–1.0108                   | 1.0082                   | 1.0037–1.0041                  |           |
| Human CSF                             |                                 |                                 |                          |                                | 3         |
| Mean                                  | 1.0070                          | 1.0077                          | 1.0040                   | 1.0010                         |           |
| Safe, normal range<br>(= 3 SD)        | 1.0058–1.0082                   | 1.0065–1.0089                   | 1.0028–1.0052            | 0.9998–1.0022                  |           |

\* Numerically equals Sp Gr  $\frac{25}{4}$  C.† Numerically equals Sp Gr  $\frac{37}{4}$  C.

‡ Hypobaric re CSF at body temperature.

§ Modlinger RE, Astra Pharmaceutical Products, Worcester, Mass.

¶ Urdang A, Winthrop Laboratories, New York, N.Y.

• Gunson GH, Manni PE, Pennwalt Prescription Products, Rochester, N.Y.

ature. Failure of authors to tabulate both temperatures has created unnecessary confusion in the relationship of Sp Gr of CSF versus spinal or peridural anesthetics, which may enter the human CSF and exert an effect at body temperature.

In a recent valuable Clinical Report,<sup>4</sup> specific gravities were tabulated with only one temperature. Cooperative pharmaceutical companies have provided the values in table 1 with both required temperatures, and I computed the densities. Proprietary solutions contain the generic components plus additives for osmolality, pH, and/or preservation. Pharmacologically, these additives may be inert; but physically, they are significant. Where so listed, the companies indicated that their proprietary solutions were actually measured.

The Clinical Report<sup>4</sup> stated that "the specific gravity of cerebrospinal fluid is greatly increased" by the intravenous infusion of 40 g glucose as 5 per cent dextrose in lactated Ringer's solution within an hour to a 58-kg non-diabetic primigravida. I believe that this degree of elevation is quantitatively untested and unknown. One g/kg glucose given intravenously over a 3-5-minute period to normal human subjects elevated the CSF glucose content to a maximum of only 60 mg/100 ml above the pre-test level.<sup>5</sup> In non-diabetic human subjects whose blood sugars were artificially raised as high as 300 mg/100 ml over a 2½-hour period, the maximum CSF glucose content was 100 mg/100 ml.<sup>6</sup> One diabetic patient who had a CSF glucose content of 156 mg/100 ml had a measured D 37 C of 1.0013 g/ml—increased, but well within the normal range.<sup>3</sup>

It is tempting to extrapolate densities (or specific gravities) measured at 25 C to the

clinically useful 37 C or to relate the D of agents measured at 25 C to the D of CSF at 25 C and then assume that these relationships are valid at 37 C. These processes may well be scientifically unsound and medicolegally dangerous. Technical equipment is presently available to pharmaceutical manufacturers, who often provide important and complete data upon request. Anesthesiologists would procure more such information if they announced that they would utilize only such agents for which the data are published.

HAROLD DAVIS, M.D.  
333 Magellan Avenue  
San Francisco, California 94116

#### REFERENCES

1. Davis H: Specific gravity of urine. JAMA 157: 749, 1955
2. Davis H, King WR: Densities of common spinal anesthetic solutions at body temperature. ANESTHESIOLOGY 13:184-188, 1952
3. Davis H, King WR: Densities of cerebrospinal fluid of human beings. ANESTHESIOLOGY 15: 666-672, 1954
4. Kim YI, Mazza NM, Marx GF: Massive spinal block with hemiparesis after a "test dose" for extradural analgesia. ANESTHESIOLOGY 43:370-372, 1975
5. Sifontes JE, Brooke Williams RD, Lincoln EM, et al: Observations on the effect of induced hyperglycemia on the glucose content of the cerebrospinal fluid in patients with tuberculous meningitis. Am Rev Tuberc 67: 732-754, 1953
6. Cohen H, Libman S: The effect of induced hyperglycemia on the glucose content of the cerebrospinal fluid. Q J Med 5:169-182, 1936

(Accepted for publication November 18, 1975)

### Society of Obstetrical Anesthesia and Perinatology

To the Editor:—The communication from Doctor Gertie Marx describing the history of the Committee on Maternal Welfare of the American Society of Anesthesiologists and the organization and early activities of the Society of Obstetrical Anesthesia and Perinatology was most enjoyable and, I believe, very appropriate. I would like to point out that Dr. Richard B. Clark, Dr. James O. Elam, and Dr. James A. Evans were also co-founders of

the Society of Obstetrical Anesthesia and Perinatology. They share equally with those of us who were graciously mentioned in responsibility for and initiation of this organization.

BRADLEY E. SMITH, M.D.  
Professor and Chairman  
Department of Anesthesiology  
School of Medicine  
Vanderbilt University  
Nashville, Tennessee 37232
